# Supplementary material for: Dangguijakyak-san ameliorates memory deficits in ovariectomized mice by upregulating hippocampal estrogen synthesis
Source: PubMed Central journal article supplement (PMC5702078; doi:10.1186/s12906-017-2015-6), 2017-11-25
Supplement: 12906_2017_2015_MOESM3_ESM.pdf [file 12906_2017_2015_MOESM3_ESM.pdf]

### Additional file 3

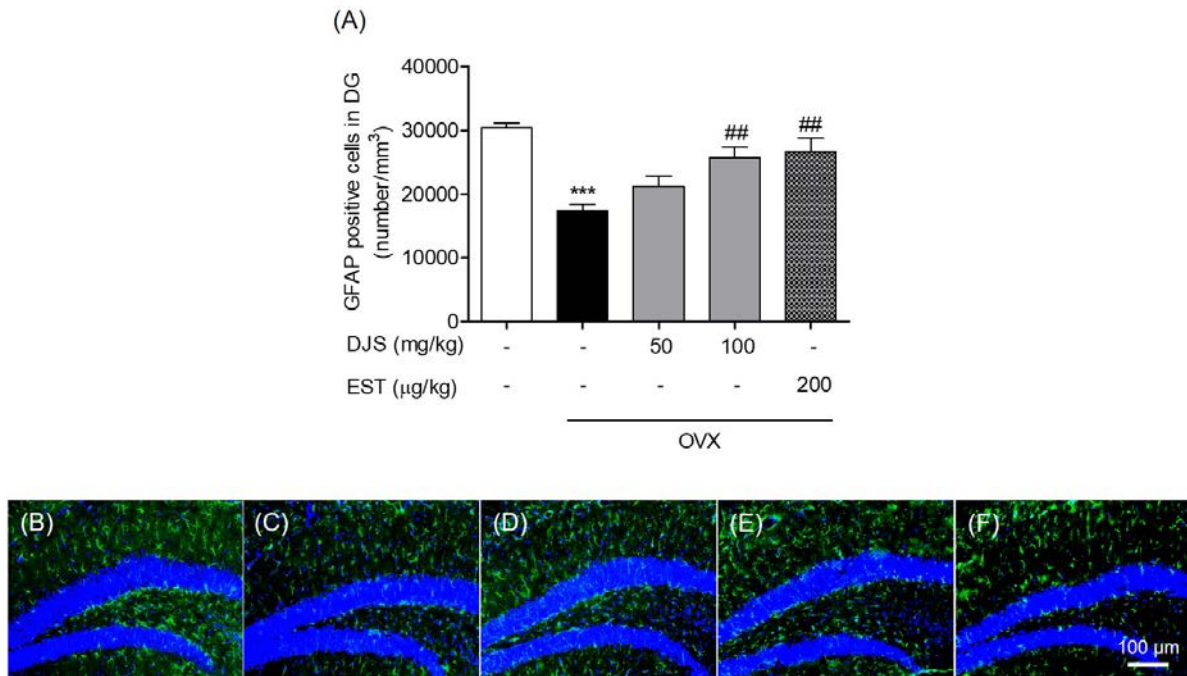

**Additional file 3.** Effects of DJS on OVX-induced decrease of astrocyte activation in the mouse hippocampus. Astrocyte activation was assessed by GFAP immunofluorescence staining (A). Each representative image was shown as follows; sham-operated (B), OVX (C), OVX+DJS 50 mg/kg (D), OVX+DJS 100 mg/kg (E), and OVX+EST 200 µg/kg (F). Scale bar = 100 µm. \*\*\* $p < 0.001$  compared with the sham group, ## $p < 0.01$  compared with the OVX group.
