# Supplementary material for: Dangguijakyak-san ameliorates memory deficits in ovariectomized mice by upregulating hippocampal estrogen synthesis
Source: Springer Nature journal article supplement (doi:10.1186/s12906-017-2015-6), 2017-11-25
Supplement: MOESM1 [file 15254042]

### Additional file 1

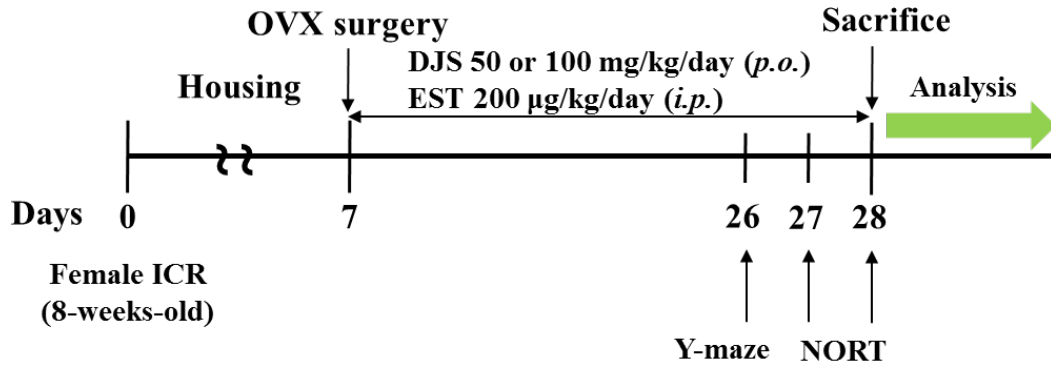

**Additional file 1.** Experimental design for surgery, drug administration and behavioral test. OVX: ovariectomized; DJS: dangguijakyak-san; EST: 17 $\beta$ -estradiol; NORT: novel object recognition test.
