# Supplementary material for: Dangguijakyak-san ameliorates memory deficits in ovariectomized mice by upregulating hippocampal estrogen synthesis
Source: Springer Nature journal article supplement (doi:10.1186/s12906-017-2015-6), 2017-11-25
Supplement: MOESM2 [file 15254042]

## Additional file 2

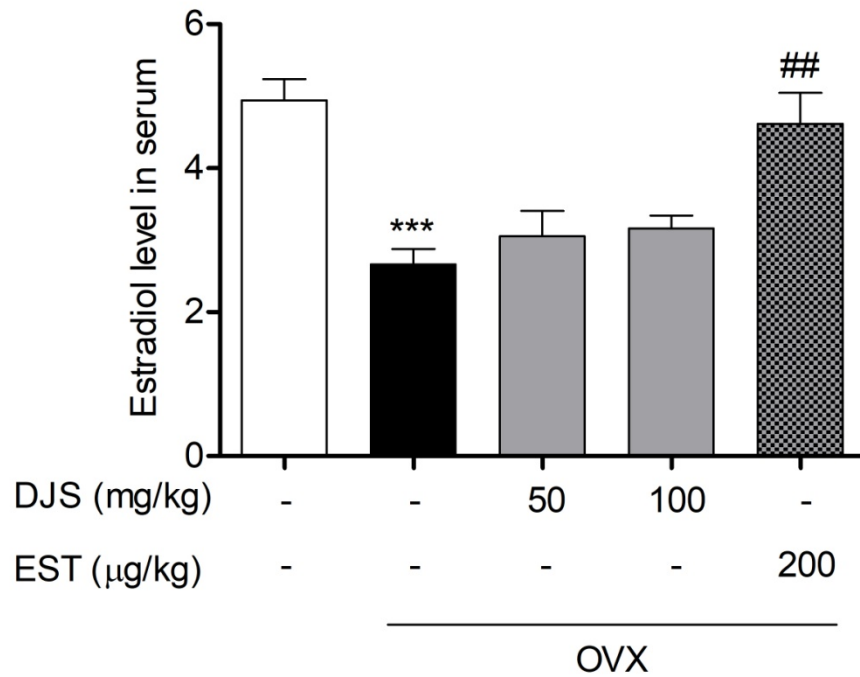

**Additional file 2.** DJS did not induce serum estrogen synthesis in OVX mice. Female mice were administrated with DJS at the concentration of 50 and 100 mg/kg/day and 17 $\beta$ -estradiol at 200  $\mu$ g/kg/day for 21 days after OVX surgery. Then, 17 $\beta$ -estradiol levels in the seum were measured by enzyme-linked immunosorbent assay. Values are means  $\pm$  standard error. \*\*\*p < 0.001 compared with the sham group, ##p < 0.01 compared with the OVX group.
